# Supplementary material for: A novel Arabidopsis marker line that strongly labels uninucleate microspores and the subsequent male gametophyte development stages
Source: PubMed Central journal article supplement (PMC3671114; doi:10.1186/2193-1801-2-237), 2013-05-24
Supplement: 40064_2013_304_MOESM3_ESM.pdf [file 40064_2013_304_MOESM3_ESM.pdf]

**Additional file 3: Table S1**

**A novel *Arabidopsis* marker line that strongly labels uninucleate microspores and the subsequent male gametophyte development stages.**

José António da Costa-Nunes<sup>1\*</sup>

\* Corresponding author

Email: [j.dacostanunes@wolfson.oxon.org](mailto:j.dacostanunes@wolfson.oxon.org)

<sup>1</sup> CBAA - Instituto Superior de Agronomia, Universidade Técnica de Lisboa, Tapada da Ajuda, Lisboa P-1349-017, Portugal

### Additional file 3: Table S1

The different (and independently transformed) lines from the *pAt5g17340:Uida:GFP* marker line reported in this manuscript.

| Independent transformant / lines: | Marker line construct:     | Genotype / background:  | Notes:                                                                                                                                                                                                                                                                                                                                                                                                                                                                                                                                                                                                                                        |
|-----------------------------------|----------------------------|-------------------------|-----------------------------------------------------------------------------------------------------------------------------------------------------------------------------------------------------------------------------------------------------------------------------------------------------------------------------------------------------------------------------------------------------------------------------------------------------------------------------------------------------------------------------------------------------------------------------------------------------------------------------------------------|
| <b>GC21</b><br>( <i>qrt1-1</i> )  | <i>pAt5g17340:Uida:GFP</i> | F2<br>Col-0 x Landsberg | <ul style="list-style-type: none"> <li>- Descendent from one (1<sup>st</sup>) of the independently transformed <i>pAt5g17340:Uida:GFP</i> lines and <i>qrt1-1</i>.</li> <li>- Line containing plants homozygous and heterozygous for the <i>qrt1-1</i> mutation and homozygous and hemizygous for the <i>pAt5g17340:Uida:GFP</i> construct.</li> </ul>                                                                                                                                                                                                                                                                                        |
|                                   |                            |                         |                                                                                                                                                                                                                                                                                                                                                                                                                                                                                                                                                                                                                                               |
| <b>G65</b>                        | <i>pAt5g17340:Uida:GFP</i> | Col-0                   | <ul style="list-style-type: none"> <li>- Descendent from a 2<sup>nd</sup> independently transformed <i>pAt5g17340:Uida:GFP</i> line.</li> <li>- Line containing plants homozygous and hemizygous for the <i>pAt5g17340:Uida:GFP</i> construct.</li> <li>- The anthers of hemizygous G65 plants exhibit a 50% GFP labelled <i>versus</i> 50% non-GFP labelled pollen ratio; indication of a single T-DNA insertion.</li> <li>- Lines descendent from G65, that are heterozygous for <i>qrt1-1</i> and hemizygous for the <i>pAt5g17340:Uida:GFP</i> construct (Hygromycin Resistant:Hygromycin sensitive; 3:1), are also available.</li> </ul> |
| <b>G138</b>                       | <i>pAt5g17340:Uida:GFP</i> | Col-0                   | <ul style="list-style-type: none"> <li>- Descendent from self-pollinated G65.</li> <li>- Is homozygous for the <i>pAt5g17340:Uida:GFP</i> construct.</li> </ul>                                                                                                                                                                                                                                                                                                                                                                                                                                                                               |
|                                   |                            |                         |                                                                                                                                                                                                                                                                                                                                                                                                                                                                                                                                                                                                                                               |

|                                  |                            |                         |                                                                                                                                                                                                                                                                                                                                                                      |
|----------------------------------|----------------------------|-------------------------|----------------------------------------------------------------------------------------------------------------------------------------------------------------------------------------------------------------------------------------------------------------------------------------------------------------------------------------------------------------------|
| <b>G57</b>                       | <i>pAt5g17340:UidA:GFP</i> | Col-0                   | <ul style="list-style-type: none"> <li>- Descendent from a 3<sup>rd</sup> independently transformed <i>pAt5g17340:UidA:GFP</i> line.</li> <li>- Lines descendent from G57, that are heterozygous for <i>qrt1-1</i> and hemizygous for the <i>pAt5g17340:UidA:GFP</i> construct (Hygromycin Resistant:Hygromycin sensitive; 3:1), are also available.</li> </ul>      |
| <b>G63</b>                       | <i>pAt5g17340:UidA:GFP</i> | Col-0                   | <ul style="list-style-type: none"> <li>- Descendent from self-pollinated G57.</li> <li>- Line containing plants homozygous and hemizygous for the <i>pAt5g17340:UidA:GFP</i> construct.</li> <li>- The anthers of hemizygous G63 plants exhibit a 50% GUS stained <i>versus</i> 50% non-GUS stained pollen ratio; indication of a single T-DNA insertion.</li> </ul> |
| <b>GC3</b><br>( <i>qrt1-1</i> )  | <i>pAt5g17340:UidA:GFP</i> | F1<br>Col-0 x Landsberg | <ul style="list-style-type: none"> <li>- GC3 is descendent from G57 and <i>qrt1-1</i>.</li> <li>- Line containing plants heterozygous for the <i>qrt1-1</i> mutation and hemizygous for the <i>pAt1g02790:UidA:GFP</i> construct.</li> </ul>                                                                                                                         |
|                                  |                            |                         |                                                                                                                                                                                                                                                                                                                                                                      |
| <b>GC7</b><br>( <i>qrt1-1</i> )  | <i>pAt5g17340:UidA:GFP</i> | F1<br>Col-0 x Landsberg | <ul style="list-style-type: none"> <li>- Descendent from a 4<sup>th</sup> independently transformed <i>pAt5g17340:UidA:GFP</i> line and <i>qrt1-1</i>.</li> <li>- Line containing plants heterozygous for the <i>qrt1-1</i> mutation and hemizygous for the <i>pAt1g02790:UidA:GFP</i> construct.</li> </ul>                                                         |
| <b>GC30</b><br>( <i>qrt1-1</i> ) | <i>pAt5g17340:UidA:GFP</i> | F2<br>Col-0 x Landsberg | <ul style="list-style-type: none"> <li>- GC30 is descendent from self-pollinated GC7.</li> <li>- Line containing plants homozygous and heterozygous for the <i>qrt1-1</i> mutation and homozygous and hemizygous for the <i>pAt5g17340:UidA:GFP</i> construct.</li> </ul>                                                                                            |
|                                  |                            |                         |                                                                                                                                                                                                                                                                                                                                                                      |

**Additional file 3: Table S1** - Table listing the lines reported in this manuscript
